# Supplementary material for: A novel viral lineage distantly related to herpesviruses discovered within fish genome sequence data
Source: Oxford University Press journal article supplement (doi:10.1093/ve/vex016), 2017-07-01
Supplement: vex016_Supp_table_s1.xls [file vex016_Supp_table_s1.xls]

## Sheet: Sheet2
	First round tBLASTn										Second Round BLASTn
Top 21 hits	Used as query for second blast	Initial shortlist	Description	Max score	Total score	Query coverage	E value	Identitiy	Accession		Description	Max score	Total score	Query coverage	E value	Identitiy	Accession
		x	Oryzias latipes DNA, contig103270 in scaffold4278, strain: HNI, whole genome shotgun sequence	397	397	0.92	3e-109	0.27	BAAE01103386.1		Amphilophus citrinellus genome assembly Midas_v5, contig scaffold-728, whole genome shotgun sequence	2683	2683	1	0	0.99	CCOE01000729.1
		x	Oryzias latipes DNA, contig126113 in scaffold3897, strain: Hd-rR, whole genome shotgun sequence	385	385	0.86	5e-107	0.28	BAAF04126113.1		Periophthalmus magnuspinnatus scaffold1146_10, whole genome shotgun sequence	1904	1904	1	0	0.69	JACL01023553.1
		x	Periophthalmus magnuspinnatus scaffold1146_10, whole genome shotgun sequence	395	395	0.85	5e-109	0.27	JACL01023553.1		Salmo salar breed double haploid jcf1001231046_0_0, whole genome shotgun sequence	1859	1859	1	0	0.66	AGKD04031988.1
			Larimichthys crocea contig18883, whole genome shotgun sequence	318	361	0.8	1e-84	0.29	JRPU01018873.1		Larimichthys crocea contig20633, whole genome shotgun sequence	1735	1735	1	0	0.63	JRPU01020623.1
			Larimichthys crocea contig5874, whole genome shotgun sequence	355	355	0.8	3e-96	0.28	JRPU01005872.1		Larimichthys crocea contig5874, whole genome shotgun sequence	1734	1734	1	0	0.62	JRPU01005872.1
		x	Oreochromis niloticus contig063490, whole genome shotgun sequence	299	405	0.8	1e-102	0.28	AERX01063490.2		Nothobranchius furzeri breed GRZ contig_37132, whole genome shotgun sequence	1694	1694	1	0	0.62	JNBZ01173257.1
	x	x	Oryzias latipes DNA, contig9841 in scaffold204, strain: HNI, whole genome shotgun sequence	363	363	0.8	7e-99	0.27	BAAE01009841.1		Pundamilia nyererei contig063967, whole genome shotgun sequence	1669	1669	0.93	0	0.65	AFNX01063967.1
		x	Oryzias latipes DNA, contig111357 in scaffold1115, strain: Hd-rR, whole genome shotgun sequence	358	358	0.8	4e-97	0.27	BAAF04111357.1		Oryzias latipes DNA, contig111357 in scaffold1115, strain: Hd-rR, whole genome shotgun sequence	1661	1661	1	0	0.61	BAAF04111357.1
		x	Larimichthys crocea contig20633, whole genome shotgun sequence	358	358	0.8	6e-97	0.27	JRPU01020623.1		Oryzias latipes DNA, contig103270 in scaffold4278, strain: HNI, whole genome shotgun sequence	1661	1661	0.99	0	0.61	BAAE01103386.1
		x	Nothobranchius furzeri breed GRZ contig_37132, whole genome shotgun sequence	368	368	0.8	4e-100	0.26	JNBZ01173257.1		Oryzias latipes DNA, contig126113 in scaffold3897, strain: Hd-rR, whole genome shotgun sequence	1660	1660	0.99	0	0.61	BAAF04126113.1
			Larimichthys crocea contig937, whole genome shotgun sequence	193	357	0.79	4e-88	0.3	JRPU01000937.1		Oryzias latipes DNA, contig9841 in scaffold204, strain: HNI, whole genome shotgun sequence	1658	1658	1	0	0.61	BAAE01009841.1
	x	x	Amphilophus citrinellus genome assembly Midas_v5, contig scaffold-728, whole genome shotgun sequence	356	356	0.77	2e-96	0.26	CCOE01000729.1		Salmo salar breed double haploid tcf1000000046_0-0_ssa08_2_0, whole genome shotgun sequence	1531	1830	0.99	0	0.66	AGKD04000303.1
		x	Salmo salar breed double haploid jcf1001231046_0_0, whole genome shotgun sequence	377	377	0.76	7e-104	0.27	AGKD04031988.1		Salmo salar breed double haploid jcf1000675607_0-0_ssa10_0_0, whole genome shotgun sequence	1451	1942	0.98	0	0.66	AGKD04000114.1
		x	Pundamilia nyererei contig063967, whole genome shotgun sequence	356	356	0.68	1e-98	0.28	AFNX01063967.1		Larimichthys crocea contig18883, whole genome shotgun sequence	1422	1725	0.99	0	0.64	JRPU01018873.1
	x	x	Boleophthalmus pectinirostris scaffold1197_21, whole genome shotgun sequence	151	705	0.68	3e-33	0.24	JACK01087215.1		Salmo salar breed double haploid jcf1000081466_0_0, whole genome shotgun sequence	1321	1321	0.69	0	0.68	AGKD04026083.1
			Salmo salar breed double haploid jcf1000466256_0-0_ssa27_0_0, whole genome shotgun sequence	263	432	0.67	3e-67	0.29	AGKD04000107.1		Salmo salar breed double haploid jcf1000035191_0-0_ssa16-ssa17_0_0, whole genome shotgun sequence	1241	1241	0.67	0	0.67	AGKD04000855.1
			Salmo salar breed double haploid tcf2000000048_0-0_ssa06_0_0, whole genome shotgun sequence	119	381	0.67	3e-44	0.26	AGKD04000476.1		Oreochromis niloticus contig063490, whole genome shotgun sequence	1175	1847	0.99	0	0.7	AERX01063490.2
			Salmo salar breed double haploid tcf1000000046_0-0_ssa08_2_0, whole genome shotgun sequence	317	317	0.66	5e-84	0.28	AGKD04000303.1		Salmo salar breed double haploid jcf1000466256_0-0_ssa27_0_0, whole genome shotgun sequence	1159	1823	0.84	0	0.7	AGKD04000107.1
			Salmo salar breed double haploid jcf1000675607_0-0_ssa10_0_0, whole genome shotgun sequence	328	328	0.65	1e-87	0.28	AGKD04000114.1		Salmo salar breed double haploid tcf2000000012_0-0_ssa09_1560_0, whole genome shotgun sequence	1053	1053	0.53	0	0.7	AGKD04000080.1
		x	Esox lucius Scaffold649, whole genome shotgun sequence	92.8	318	0.63	2e-15	0.26	AZJR02000460.1		Larimichthys crocea contig937, whole genome shotgun sequence	978	1723	1	0	0.64	JRPU01000937.1
		x	Oncorhynchus mykiss WGS project data, contig 51366, whole genome shotgun sequence	192	338	0.6	1e-45	0.3	CCAF010051366.1		Oryzias latipes DNA, contig126497 in scaffold4023, strain: Hd-rR, whole genome shotgun sequence	804	804	0.48	0	0.63	BAAF04126497.1
			Salmo salar breed double haploid jcf1000081466_0_0, whole genome shotgun sequence	277	277	0.54	6e-72	0.28	AGKD04026083.1		Oncorhynchus mykiss WGS project data, contig 51366, whole genome shotgun sequence	726	1528	0.83	0	0.7	CCAF010051366.1
			Salmo salar breed double haploid jcf1000035191_0-0_ssa16-ssa17_0_0, whole genome shotgun sequence	266	266	0.52	3e-68	0.28	AGKD04000855.1		Boleophthalmus pectinirostris scaffold1197_21, whole genome shotgun sequence	702	2444	0.98	0	0.5	JACK01087215.1
			Salmo salar breed double haploid tcf2000000012_0-0_ssa09_1560_0, whole genome shotgun sequence	243	243	0.44	2e-61	0.29	AGKD04000080.1		Pundamilia nyererei contig062002, whole genome shotgun sequence	682	682	0.4	0	0.6	AFNX01062002.1
			Oreochromis niloticus contig067013, whole genome shotgun sequence	171	265	0.42	8e-41	0.32	AERX01067013.1		Neolamprologus brichardi contig056855, whole genome shotgun sequence	679	679	0.33	0	0.71	AFNY01056855.1
			Oryzias latipes DNA, contig126497 in scaffold4023, strain: Hd-rR, whole genome shotgun sequence	206	206	0.37	3e-52	0.3	BAAF04126497.1		Esox lucius Scaffold649, whole genome shotgun sequence	674	1502	0.99	0	0.47	AZJR02000460.1
			Oncorhynchus mykiss WGS project data, contig 58454, whole genome shotgun sequence	97.8	265	0.35	2e-54	0.35	CCAF010058454.1		Esox lucius Scaffold1210, whole genome shotgun sequence	672	809	0.55	0	0.57	AZJR02001005.1
			Nothobranchius furzeri breed GRZ contig_167764, whole genome shotgun sequence	169	383	0.33	1e-38	0.33	JNBZ01073941.1		Oreochromis niloticus contig066994, whole genome shotgun sequence	632	632	0.34	0	0.67	AERX01066994.2
			Cynoglossus semilaevis scaffold1781_2, whole genome shotgun sequence	77.4	261	0.33	4e-19	0.29	AGRG01030024.1		Melanochromis auratus strain Domwe Island MAURA1011390_1, whole genome shotgun sequence	626	626	0.31	0	0.72	ABPL01018272.1
			Esox lucius Scaffold1210, whole genome shotgun sequence	152	152	0.29	2e-33	0.31	AZJR02001005.1		Oreochromis niloticus contig067013, whole genome shotgun sequence	613	1033	0.53	0	0.73	AERX01067013.1
			Neolamprologus brichardi contig056855, whole genome shotgun sequence	190	190	0.28	4e-48	0.3	AFNY01056855.1		Oreochromis niloticus contig071449, whole genome shotgun sequence	600	600	0.36	0	0.57	AERX01071449.2
			Oreochromis niloticus contig066994, whole genome shotgun sequence	134	134	0.28	2e-29	0.27	AERX01066994.2		Salmo salar breed double haploid tcf2000000048_0-0_ssa06_0_0, whole genome shotgun sequence	560	1819	0.99	0	0.65	AGKD04000476.1
			Melanochromis auratus strain Domwe Island MAURA1011390_1, whole genome shotgun sequence	189	189	0.25	3e-48	0.32	ABPL01018272.1		Oncorhynchus mykiss WGS project data, contig 58454, whole genome shotgun sequence	312	987	0.51	0	0.64	CCAF010058454.1
			Pundamilia nyererei contig062002, whole genome shotgun sequence	96.3	96.3	0.25	5e-17	0.23	AFNX01062002.1		Nothobranchius furzeri breed GRZ contig_167764, whole genome shotgun sequence	512	1948	0.53	3e-180	0.66	JNBZ01073941.1
			Salmo salar breed double haploid jcf1000366616_0_0, whole genome shotgun sequence	55.5	106	0.24	2e-13	0.3	AGKD04055112.1		Salmo salar breed double haploid jcf1000366616_0_0, whole genome shotgun sequence	441	624	0.35	1e-168	0.61	AGKD04055112.1
			Salmo salar breed double haploid jcf1000499427_0_0, whole genome shotgun sequence	135	199	0.23	4e-41	0.31	AGKD04197423.1		Salmo salar breed double haploid jcf1000499427_0_0, whole genome shotgun sequence	480	638	0.3	1e-153	0.67	AGKD04197423.1
			Oreochromis niloticus contig071449, whole genome shotgun sequence	93.2	93.2	0.23	4e-16	0.25	AERX01071449.2		Salmo salar breed double haploid jcf1000986304_0_0, whole genome shotgun sequence	475	475	0.23	4e-153	0.72	AGKD04281921.1
			Oryzias latipes DNA, contig126496 in scaffold4023, strain: Hd-rR, whole genome shotgun sequence	63.9	115	0.21	4e-07	0.39	BAAF04126496.1		Salmo salar breed double haploid ccf1000000011_0-0_ssa14_0_0, whole genome shotgun sequence	483	483	0.28	2e-138	0.6	AGKD04000035.1
			Cynoglossus semilaevis scaffold606_2, whole genome shotgun sequence	122	122	0.2	1e-24	0.31	AGRG01017733.1		Oreochromis niloticus contig066995, whole genome shotgun sequence	449	449	0.27	7e-138	0.58	AERX01066995.2
			Cynoglossus semilaevis scaffold291_6, whole genome shotgun sequence	69.7	298	0.19	2e-08	0.33	AGRG01009146.1		Salmo salar breed double haploid jcf1000070863_0_0, whole genome shotgun sequence	381	439	0.25	1e-117	0.6	AGKD04239310.1
			Salmo salar breed double haploid jcf1000986304_0_0, whole genome shotgun sequence	133	133	0.19	6e-30	0.31	AGKD04281921.1		Cynoglossus semilaevis scaffold606_2, whole genome shotgun sequence	380	507	0.35	4e-112	0.56	AGRG01017733.1
			Salmo salar breed double haploid ccf1000000011_0-0_ssa14_0_0, whole genome shotgun sequence	91.3	91.3	0.19	5e-15	0.26	AGKD04000035.1		Cynoglossus semilaevis scaffold1781_2, whole genome shotgun sequence	292	1090	0.66	1e-111	0.57	AGRG01030024.1
			Salmo salar breed double haploid tcf1000000134_0-0_ssa11-ssa26_0_0, whole genome shotgun sequence	79.7	79.7	0.17	2e-11	0.25	AGKD04000842.1		Salmo salar breed double haploid tcf1000000134_0-0_ssa11-ssa26_0_0, whole genome shotgun sequence	397	397	0.23	2e-110	0.62	AGKD04000842.1
			Cynoglossus semilaevis scaffold315_3, whole genome shotgun sequence	56.6	107	0.15	0.0002	0.27	AGRG01009869.1		Oryzias latipes DNA, contig11641 in scaffold251, strain: HNI, whole genome shotgun sequence	364	364	0.22	8e-110	0.55	BAAE01011641.1
			Oreochromis niloticus contig066995, whole genome shotgun sequence	54.7	54.7	0.15	0.0004	0.23	AERX01066995.2		Salmo salar breed double haploid jcf1000223190_0_0, whole genome shotgun sequence	348	348	0.2	1e-106	0.61	AGKD04408741.1
			Salmo salar breed double haploid jcf1000094186_0-870771_ssa23_0_0, whole genome shotgun sequence	85.1	85.1	0.13	4e-13	0.3	AGKD04000549.1		Salmo salar breed double haploid jcf1000894696_0_0, whole genome shotgun sequence	295	406	0.21	5e-103	0.66	AGKD04126327.1
			Salmo salar breed double haploid jcf1000308296_0_0, whole genome shotgun sequence	82	82	0.13	1e-13	0.29	AGKD04759675.1		Salmo salar breed double haploid jcf1000971150_0_0, whole genome shotgun sequence	335	378	0.21	4e-101	0.59	AGKD04300645.1
			Salmo salar breed double haploid jcf1000070863_0_0, whole genome shotgun sequence	80.1	80.1	0.13	1e-12	0.28	AGKD04239310.1		Melanochromis auratus strain Domwe Island MAURA1007280_1, whole genome shotgun sequence	339	465	0.27	4e-100	0.6	ABPL01012874.1
			Pampus argenteus breed Wild-type scaffold266821, whole genome shotgun sequence	72.4	115	0.12	5e-16	0.32	JHEK01266819.1		Cynoglossus semilaevis scaffold291_6, whole genome shotgun sequence	218	1179	0.52	1e-98	0.66	AGRG01009146.1
			Salmo salar breed double haploid jcf1000863852_0_0, whole genome shotgun sequence	82.8	82.8	0.12	2e-12	0.31	AGKD04014003.1		Melanochromis auratus strain Domwe Island MAURA1054855_1, whole genome shotgun sequence	311	311	0.17	2e-93	0.62	ABPL01073471.1
			Salmo salar breed double haploid jcf1000971150_0_0, whole genome shotgun sequence	70.1	70.1	0.12	2e-09	0.3	AGKD04300645.1		Salmo salar breed double haploid jcf1000094186_0-870771_ssa23_0_0, whole genome shotgun sequence	337	337	0.18	5e-91	0.66	AGKD04000549.1
			Salmo salar breed double haploid jcf1000223190_0_0, whole genome shotgun sequence	72	72	0.12	3e-10	0.29	AGKD04408741.1		Salmo salar breed double haploid jcf1000729702_0_0, whole genome shotgun sequence	299	299	0.17	3e-89	0.64	AGKD04644989.1
			Salmo salar breed double haploid jcf1000677822_0_0, whole genome shotgun sequence	75.1	75.1	0.12	2e-11	0.28	AGKD04786333.1		Salmo salar breed double haploid jcf1000308296_0_0, whole genome shotgun sequence	291	291	0.15	5e-87	0.68	AGKD04759675.1
			Oryzias latipes DNA, contig11641 in scaffold251, strain: HNI, whole genome shotgun sequence	54.3	54.3	0.12	0.0004	0.27	BAAE01011641.1		Salmo salar breed double haploid jcf1001205191_0_0, whole genome shotgun sequence	277	351	0.18	2e-86	0.6	AGKD04520858.1
			Salmo salar breed double haploid jcf1000052362_0-0_ssa05_0_0, whole genome shotgun sequence	73.6	73.6	0.11	1e-09	0.27	AGKD04001468.1		Oryzias latipes DNA, contig126496 in scaffold4023, strain: Hd-rR, whole genome shotgun sequence	294	481	0.29	2e-85	0.61	BAAF04126496.1
			Salmo salar breed double haploid jcf1000894696_0_0, whole genome shotgun sequence	42	42	0.11	3.5	0.23	AGKD04126327.1		Salmo salar breed double haploid jcf1000052362_0-0_ssa05_0_0, whole genome shotgun sequence	311	779	0.31	1e-82	0.56	AGKD04001468.1
			Salmo salar breed double haploid jcf1000672973_0_0, whole genome shotgun sequence	100	100	0.1	3e-18	0.36	AGKD04070803.1		Salmo salar breed double haploid jcf1000337496_0_0, whole genome shotgun sequence	267	267	0.15	6e-77	0.61	AGKD04268163.1
			Oryzias latipes DNA, contig92110 in scaffold3621, strain: HNI, whole genome shotgun sequence	73.6	73.6	0.1	2e-10	0.31	BAAE01092067.1		Salmo salar breed double haploid jcf1000672973_0_0, whole genome shotgun sequence	278	278	0.12	9e-77	0.8	AGKD04070803.1
			Oryzias latipes DNA, contig297681 in scaffold36800, strain: HNI, whole genome shotgun sequence	52	52	0.1	0.002	0.28	BAAE01297766.1		Salmo salar breed double haploid jcf1000677822_0_0, whole genome shotgun sequence	260	260	0.14	4e-76	0.66	AGKD04786333.1
			Salmo salar breed double haploid jcf1000584432_0_0, whole genome shotgun sequence	69.3	69.3	0.1	1e-08	0.27	AGKD04082652.1		Oryzias latipes DNA, contig297681 in scaffold36800, strain: HNI, whole genome shotgun sequence	260	417	0.22	2e-74	0.59	BAAE01297766.1
			Salmo salar breed double haploid jcf1000729702_0_0, whole genome shotgun sequence	76.3	76.3	0.09	1e-11	0.32	AGKD04644989.1		Pampus argenteus breed Wild-type scaffold296198, whole genome shotgun sequence	199	393	0.34	2e-72	0.4	JHEK01296196.1
			Pampus argenteus breed Wild-type scaffold296198, whole genome shotgun sequence	48.1	71.2	0.08	0.005	0.42	JHEK01296196.1		Pampus argenteus breed Wild-type scaffold266821, whole genome shotgun sequence	179	296	0.16	3e-70	0.59	JHEK01266819.1
			Pampus argenteus breed Wild-type scaffold219622, whole genome shotgun sequence	60.5	60.5	0.07	9e-07	0.34	JHEK01219620.1		Salmo salar breed double haploid jcf1000584432_0_0, whole genome shotgun sequence	242	242	0.13	5e-65	0.67	AGKD04082652.1
			Salmo salar breed double haploid jcf1000981944_0_0, whole genome shotgun sequence	61.2	61.2	0.05	2e-06	0.41	AGKD04241185.1		Salmo salar breed double haploid jcf1000863852_0_0, whole genome shotgun sequence	253	253	0.15	7e-65	0.63	AGKD04014003.1
			Salmo salar breed double haploid jcf1000267125_0_0, whole genome shotgun sequence	58.9	58.9	0.05	6e-06	0.35	AGKD04414339.1		Cynoglossus semilaevis scaffold315_3, whole genome shotgun sequence	225	522	0.32	7e-64	0.61	AGRG01009869.1
			Pimephales promelas scaffold-189977, whole genome shotgun sequence	41.6	41.6	0.03	6.3	0.35	JNCE01189963.1		Oryzias latipes DNA, contig126500 in scaffold4023, strain: Hd-rR, whole genome shotgun sequence	211	211	0.13	7e-56	0.53	BAAF04126500.1
			Pimephales promelas scaffold514, whole genome shotgun sequence	41.6	41.6	0.03	6.3	0.35	JNCD01000512.1		Salmo salar breed double haploid jcf1000948982_0_0, whole genome shotgun sequence	203	203	0.1	3e-52	0.64	AGKD04099775.1
											Salmo salar breed double haploid jcf1000901130_0_0, whole genome shotgun sequence	195	195	0.1	5e-51	0.6	AGKD04228511.1
											Oryzias latipes DNA, contig92110 in scaffold3621, strain: HNI, whole genome shotgun sequence	192	192	0.13	2e-50	0.57	BAAE01092067.1
											Oreochromis niloticus contig067011, whole genome shotgun sequence	196	196	0.11	2e-49	0.56	AERX01067011.1
											Cynoglossus semilaevis scaffold81_12, whole genome shotgun sequence	118	226	0.12	5e-49	0.65	AGRG01002782.1
											Salmo salar breed double haploid jcf1000267125_0_0, whole genome shotgun sequence	184	184	0.09	2e-48	0.7	AGKD04414339.1
											Pampus argenteus breed Wild-type scaffold219622, whole genome shotgun sequence	174	277	0.13	1e-45	0.66	JHEK01219620.1
											Neolamprologus brichardi contig056854, whole genome shotgun sequence	137	137	0.08	3e-33	0.52	AFNY01056854.1
											Nothobranchius furzeri breed GRZ contig_167765, whole genome shotgun sequence	139	204	0.1	5e-30	0.6	JNBZ01073942.1
											Salmo salar breed double haploid jcf1001055536_0_0, whole genome shotgun sequence	139	229	0.12	5e-30	0.55	AGKD04032731.1
											Esox lucius Scaffold445, whole genome shotgun sequence	136	281	0.17	1e-28	0.69	AZJR02000277.1
											Salmo salar breed double haploid jcf1000871019_0_0, whole genome shotgun sequence	117	154	0.09	1e-27	0.53	AGKD04788890.1
											Salmo salar breed double haploid jcf1000981944_0_0, whole genome shotgun sequence	126	126	0.05	1e-27	0.82	AGKD04241185.1
											Esox lucius Scaffold650, whole genome shotgun sequence	126	126	0.08	3e-27	0.52	AZJR02000461.1
											Salmo salar breed double haploid jcf1000526599_0_0, whole genome shotgun sequence	130	130	0.08	4e-27	0.52	AGKD04046694.1
											Salmo salar breed double haploid jcf1000240329_0_0, whole genome shotgun sequence	121	121	0.06	1e-26	0.55	AGKD04582342.1
											Oryzias latipes DNA, contig257531 in scaffold22450, strain: HNI, whole genome shotgun sequence	107	107	0.09	5e-22	0.43	BAAE01257592.1
											Pampus argenteus breed Wild-type scaffold6215, whole genome shotgun sequence	76.3	207	0.13	6e-22	0.73	JHEK01006214.1
											Pundamilia nyererei contig065325, whole genome shotgun sequence	107	107	0.06	1e-20	0.52	AFNX01065325.1
											Oryzias latipes DNA, contig334693 in scaffold70980, strain: HNI, whole genome shotgun sequence	97.1	97.1	0.05	1e-19	0.6	BAAE01334625.1
											Pampus argenteus breed Wild-type scaffold283868, whole genome shotgun sequence	79	79	0.05	2e-11	0.47	JHEK01283866.1
											Melanochromis auratus strain Domwe Island MAURA1003503_1, whole genome shotgun sequence	73.9	73.9	0.03	5e-10	0.68	ABPL01007469.1
											Oryzias latipes DNA, contig113468 in scaffold1340, strain: Hd-rR, whole genome shotgun sequence	70.1	70.1	0.04	4e-09	0.48	BAAF04113468.1
											Pampus argenteus breed Wild-type scaffold244281, whole genome shotgun sequence	59.7	59.7	0.06	4e-06	0.42	JHEK01244279.1
											Oryzias latipes DNA, contig307647 in scaffold44110, strain: HNI, whole genome shotgun sequence	59.3	59.3	0.04	8e-06	0.5	BAAE01307755.1
											Scartelaos histophorus scaffold95395_1, whole genome shotgun sequence	45.1	45.1	0.04	0.31	0.44	JACN01118715.1
											Boleophthalmus pectinirostris scaffold7332_1, whole genome shotgun sequence	42.7	42.7	0.05	0.86	0.32	JACK01099270.1
											Salmo salar breed double haploid jcf1000109986_0_0, whole genome shotgun sequence	42.7	42.7	0.01	1.8	0.67	AGKD04080171.1
											Oryzias latipes DNA, contig52599 in scaffold1692, strain: HNI, whole genome shotgun sequence	42	42	0.02	1.9	0.74	BAAE01052622.1
											Salmo salar breed double haploid jcf1000732633_0-0_ssa23_0_0, whole genome shotgun sequence	42.7	42.7	0.01	2.5	0.67	AGKD04000443.1
											Scleropages formosus scaffold443, whole genome shotgun sequence	42	42	0.08	4.6	0.29	JARO01000443.1
