# Supplementary material for: A novel viral lineage distantly related to herpesviruses discovered within fish genome sequence data
Source: Oxford University Press journal article supplement (doi:10.1093/ve/vex016), 2017-07-01
Supplement: vex016_Supp_table_s2.xlsx [file vex016_Supp_table_s2.xlsx]

## Sheet: Sheet1
		Species	Average Genome Coverage	Accession
		Melanochromis auratus	0.12x	ABPL01007469.1
				ABPL01018272.1
		Pampus argenteus	58x	JHEK01266819.1
		Neolamprologus brichardi	171x	AFNY01056855.1
		Oreochromis niloticus	44x	AERX01063490.2
				AERX01067013.1
				AERX01066994.2
		Amphilophus citrinellus	115x	CCOE01000729.1
		Boleophthalmus pectinirostris	144x	JACK01087215.1
		Nothobranchius furzeri	80x	JNBZ01173257.1
				JNBZ01073941.1
		Periophthalmus magnuspinnatus	77x	JACL01023553.1
		Pundamilia nyererei	126x	AFNX01063967.1
		Cynoglossus semilaevis	117x	AGRG01030024.1
				AGRG01009146.1
				AGRG01017733.1
				AGRG01009869.1
		Larimichthys crocea	99.1x	JRPU01020623.1
				JRPU01005872.1
				JRPU01018873.1
				JRPU01000937.1
		Salmo salar	206x	AGKD01000001.1
		Oncorhynchus mykiss	70x	CCAF010051366.1
				CCAF010058454.1
		Oryzias latipes	10.6x	BAAE01103386.1
				BAAF04126113.1
				BAAE01009841.1
				BAAF04111357.1
				BAAF04126497.1
				BAAE01297766.1
				BAAE01052622.1
				BAAE01092067.1
		Esox lucius	243x	AZJR02000460.1
				AZJR02001005.1
