# Supplementary material for: A novel viral lineage distantly related to herpesviruses discovered within fish genome sequence data
Source: Oxford University Press journal article supplement (doi:10.1093/ve/vex016), 2017-07-01
Supplement: vex016_Supp_table_s3.xlsx [file vex016_Supp_table_s3.xlsx]

## Sheet: both_genemarks.gff
ORF	Start	Stop	strand	length	Description	species	viral group	Coverage	E value	Identity	Accession
1	2191	2538	+	348
2	12536	13051	+	516	PREDICTED: piggyBac transposable element-derived protein 4-like	Takifugu rubripes	TE	0.71	1e-64	0.81	XP_011605214.1
3	13292	13678	-	387	transcriptional regulator, LuxR family	Klebsiella pneumoniae		0.16	1e-05	1	EJK89612.1
4	13752	14381	+	630	PREDICTED: piggyBac transposable element-derived protein 4-like	Poecilia formosa	TE	1	3e-97	0.7	XP_007576285.1
5	15078	15869	+	792
6	16415	18445	+	2031	ORF77L	Turbot reddish body iridovirus	Iridoviridae; Megalocytivirus;	0.3	2e-08	0.28	ADE34421.1
					VP80	Buzura suppressaria nucleopolyhedrovirus	Baculoviridae; Alphabaculovirus	0.14	2e-06	0.32	YP_009001857.1
7	19742	20869	-	1128
8	20868	21314	+	447
9	21259	22167	+	909	ORF60	Siberian sturgeon herpesvirus	Alloherpesviridae; Ictalurivirus;	0.81	4e-25	0.27	ADC79712.1
10	22491	24467	+	1977	ORF54	Acipenserid herpesvirus 2	Alloherpesviridae; Ictalurivirus	0.55	3e-10	0.24	AEF97714.1
11	26037	26354	-	318
12	26341	26781	-	441
13	27011	27364	-	354
14	27742	28824	-	1083	membrane protein ORF147B	Cyprinid herpesvirus 1	Alloherpesviridae; Cyprinivirus	0.62	4e-17	0.29	YP_007003802.1
15	29245	31062	+	1818	membrane protein ORF147A	Cyprinid herpesvirus 1	Alloherpesviridae; Cyprinivirus	0.59	5e-73	0.39	YP_007003801.1
16	31624	32331	+	708
17	32626	34053	+	1428	contains TOPRIM domain, potential nuclease COG4026
18	34134	35927	+	1794	ORF25	Acipenserid herpesvirus 2	Alloherpesviridae; Ictalurivirus	0.93	5e-47	0.27	AEF97684.1
19	36048	36479	+	432
20	36556	37425	+	870	ORF27	Ictalurid herpesvirus 1	Alloherpesviridae; Ictalurivirus	0.39	8e-06	0.29	NP_041118.1
21	37679	38146	-	468
22	38426	38953	-	528
23	38958	39557	-	600
24	39648	40250	-	603	Baculoviral inhibition of apoptosis protein
25	40338	40706	-	369	unnamed protein product Oncorhynchus mykiss	173	173	0.69	CDQ74451.1
26	41024	43027	-	2004	ORF88	Ranid herpesvirus 2	Alloherpesviridae; Batrachovirus	0.26	1e-13	0.3	YP_656596.1
27	43070	43654	-	585
28	43846	44535	+	690
29	44680	48699	+	4020	ORF46	Acipenserid herpesvirus 2	Alloherpesviridae; Ictalurivirus	0.55	3e-97	0.31	AEF97704.1
30	49111	50007	-	897
31	51851	52762	-	912	ORF62	Ictalurid herpesvirus 1	Alloherpesviridae; Ictalurivirus	0.44	3e-27	0.44	NP_041153.2
32	52949	53581	+	633
33	53777	54754	+	978
34	55096	55857	-	762
35	56235	56756	+	522
36	56917	57531	+	615
37	57904	58443	+	540
38	58515	59039	+	525	GM22539	Drosophila	sechellia	0.98	3e-14	0.33	XP_002044161.1
39	59053	59850	-	798	ORF68	Ranid herpesvirus 2	Alloherpesviridae; Batrachovirus	0.96	1e-13	0.25	YP_656576.1
40	59960	60748	+	789	Cbp/p300-interacting transactivator 1	Larimichthys crocea	345	6e-112	0.66	KKF33343.1
41	60671	61291	-	621	terminase	Acipenserid herpesvirus 2	Alloherpesviridae; Ictalurivirus	0.8	2e-37	0.42	ABQ10592.1
42	61547	62764	+	1218
43	63410	64909	-	1500	ORF64	Ictalurid herpesvirus 1	Alloherpesviridae; Ictalurivirus	0.7	3e-13	0.23	NP_041156.1
44	64906	66438	-	1533
45	66534	70034	-	3501
46	70101	71138	-	1038
47	71190	72710	+	1521
48	72797	76642	+	3846
49	76883	81688	-	4806	putative WD repeat-containing protein	Acanthamoeba polyphaga mimivirus	Mimiviridae; Mimivirus	0.05	2e-08	0.44	AKI79997.1
50	82090	83391	-	1302
51	83390	84811	+	1422	PREDICTED: uncharacterized protein LOC101156739	Oryzias latipes		0.98	3e-149	0.5	XP_004071716.2
52	85368	85817	+	450
53	87491	89581	+	2091
54	89656	90690	+	1035
55	90754	91461	+	708
56	93004	93567	-	564
57	93651	94307	-	657
58	94340	97051	-	2712	ORF39	Ictalurid herpesvirus 1	Alloherpesviridae; Ictalurivirus	0.89	3e-34	0.24	NP_041130.1
59	97203	97610	-	408
60	97710	100127	+	2418	ORF37	Acipenserid herpesvirus 2	Alloherpesviridae; Ictalurivirus	0.18	9e-12	0.26	AEF97695.1
61	101295	102137	-	843	PREDICTED: uncharacterized protein LOC105358139	Oryzias latipes		0.24	5e-15	0.57	XP_011491977.1
62	102194	103447	-	1254	ORF34	Acipenserid herpesvirus 2	Alloherpesviridae; Ictalurivirus	0.76	9e-45	0.37	AEF97692.1
63	103476	104327	-	852
64	104359	105141	+	783
65	105391	108120	-	2730	hypothetical protein EH28_02830	Larimichthys crocea		0.53	3e-165	0.55	KKF18232.1
66	108175	109683	+	1509	ORF44	Acipenserid herpesvirus 2	Alloherpesviridae; Ictalurivirus	0.42	6e-20	0.31	AEF97702.1
67	109702	110472	+	771
68	110679	112529	+	1851
69	112465	114960	+	2496	PREDICTED: GRIP and coiled-coil domain-containing protein 2-like	Neolamprologus brichardi		0.38	5e-15	0.26	XP_006800602.1
70	115269	115748	-	480	PREDICTED: uncharacterized protein LOC102076604	Oreochromis niloticus		0.67	4e-08	0.32	XP_005466037.1
71	115726	116259	-	534	hypothetical protein EH28_02830	Larimichthys crocea		0.99	7e-36	0.42	KKF18232.1
72	116382	116840	-	459
73	118811	119173	-	363
74	119483	120127	-	645
75	120541	121056	+	516
76	121457	122122	-	666	N1R/p28 family protein	Pigeonpox virus	Poxviridae; Avipoxvirus	0.42	1e-16	0.43	YP_009046385.1
77	122426	123268	-	843
78	123341	127252	+	3912	ORF73	Ictalurid herpesvirus 1	Alloherpesviridae; Ictalurivirus	0.17	3e-11	0.29	NP_041163.1
79	127359	128291	+	933	C19 subfamily protein	Moumouvirus goulette	Mimiviridae; Moumouvirus	0.5	2e-06	0.31	AGF85227.1
80	128817	132776	-	3960	PREDICTED: uncharacterized protein LOC106024916	Esox lucius		0.31	3e-37	0.51	XP_012995787.1
81	133060	133650	+	591
82	133672	134193	+	522
83	135033	135674	-	642
84	135720	136187	-	468
85	136354	137799	-	1446
86	137735	139384	-	1650	ORF57	Ictalurid herpesvirus 1	Alloherpesviridae; Ictalurivirus	0.9	8e-52	0.3	NP_041148.2
87	139507	141327	-	1821	ORF57	Ictalurid herpesvirus 1	Alloherpesviridae; Ictalurivirus	0.89	2e-32	0.26	NP_041148.2
88	142174	142734	+	561
89	143018	146236	+	3219	ORF56	Ictalurid herpesvirus 1	Alloherpesviridae; Ictalurivirus	0.48	2e-46	0.27	NP_041147.1
90	146764	147327	+	564
91	147757	148452	-	696	PREDICTED: type-2 angiotensin II receptor-like	Oryzias latipes		0.9	5e-35	0.35	XP_004084729.1
92	148493	148897	-	405	PREDICTED: uncharacterized protein LOC105358166	Oryzias latipes		0.85	3e-14	0.39	XP_011492012.1
93	149960	150628	+	669	hypothetical protein	European catfish virus	Iridoviridae; Ranavirus	0.8	3e-14	0.3	YP_006347673.1
94	150832	151452	+	621
95	151772	152560	+	789
96	153056	153838	+	783	PREDICTED: uncharacterized protein LOC102080423	Oreochromis niloticus		0.76	2e-34	0.38	XP_005466421.1
97	154332	155282	-	951	putative serine/threonine-protein kinase	Megavirus courdo11	Mimiviridae; Megavirus chiliensis	0.68	2e-17	0.28	AFX92917.1
98	156112	156462	-	351
99	156677	157438	-	762
100	157862	158488	+	627
101	159447	160637	+	1191
102	161454	161774	-	321	hypothetical protein LDVICp188	Lymphocystis disease virus - isolate China	Iridoviridae; Lymphocystivirus	0.81	3e-14	0.36	YP_073693.1
103	162613	167430	-	4818
104	168222	169493	-	1272	PREDICTED: uncharacterized protein LOC105358165	Oryzias latipes		0.56	2e-25	0.32	XP_011492011.1
105	169982	171052	-	1071	protein ORF35	Anguillid herpesvirus 1	Alloherpesviridae; Cyprinivirus	0.63	3e-11	0.25	YP_003358174.1
106	171151	171711	-	561
107	172198	173919	-	1722
108	174414	178016	-	3603
109	178102	178962	+	861	DNA methyltransferase	Lymphocystis disease virus 1	Iridoviridae; Lymphocystivirus	0.9	3e-10	0.25	NP_078617.1
110	179170	180348	-	1179	ORF63	Acipenserid herpesvirus 2	Alloherpesviridae; Ictalurivirus	0.99	8e-19	0.25	AEF97717.1
111	180452	181432	-	981
112	182030	182761	-	732
113	183961	184263	+	303
114	185640	186749	+	1110	PREDICTED: piggyBac transposable element-derived protein 4-like	Takifugu rubripes		0.5	2e-83	0.71	XP_011605214.1
115	187403	188329	+	927	PREDICTED: piggyBac transposable element-derived protein 4-like	Esox lucius		1	2e-148	0.71	XP_012987620.1
