# Supplementary material for: A novel viral lineage distantly related to herpesviruses discovered within fish genome sequence data
Source: Oxford University Press journal article supplement (doi:10.1093/ve/vex016), 2017-07-01
Supplement: vex016_Supp_table_s4.xlsx [file vex016_Supp_table_s4.xlsx]

## Sheet: both_genemarks.gff
ORF	Start	Stop	strand	length	Description	species	Coverage	E value	Identity	Accession
1	1065	1454	+	390
2	4701	5372	-	672
3	5461	6138	-	678
4	7870	8460	-	591
5	16224	17585	-	1362	PREDICTED: uncharacterized protein LOC101156739	Oryzias latipes	0.96	5e-120	0.42	XP_004071716.2
6	17521	18945	+	1425
7	19436	19789	+	354
8	23588	24145	-	558	PREDICTED: LOW QUALITY PROTEIN: cadherin-23	Astyanax mexicanus	0.61	1e-32	0.58	XP_007238651.1
9	24232	28383	+	4152
10	28540	28884	-	345
11	29245	29580	-	336
12	30801	31169	+	369
13	32303	32962	-	660
14	32961	34238	+	1278	ORF60	Ictalurid herpesvirus 1	0.44	5e-23	0.31	NP_041151.1
15	34314	36155	+	1842	ORF54	Acipenserid herpesvirus 2	0.64	1e-07	0.22	AEF97714.1
16	36756	37085	-	330
17	37655	38926	+	1272
18	38945	40690	+	1746	ORF25	Acipenserid herpesvirus 2	0.94	4e-49	0.27	AEF97684.1
19	40799	41167	+	369
20	41181	42047	+	867	ORF27	Acipenserid herpesvirus 2	0.38	1e-08	0.32	AEF97686.1
21	42144	42587	-	444
22	42779	43303	-	525
23	43307	43900	-	594
24	43964	44962	-	999	unnamed protein product	Oncorhynchus mykiss	0.54	5e-39	0.47	CDQ74451.1
25	45094	46950	-	1857	ORF88	Ranid herpesvirus 2	0.28	4e-15	0.31	YP_656596.1
26	46971	47501	-	531
27	47669	48271	+	603
28	48382	52365	+	3984	ORF46	Acipenserid herpesvirus 2	0.56	3e-89	0.3	AEF97704.1
29	52584	53915	+	1332
30	54475	55308	-	834	hypothetical protein	Acanthamoeba polyphaga mimivirus	0.28	3e-06	0.28	AKI79331.1
31	55538	55969	+	432
32	56952	57899	+	948
33	58080	59192	-	1113
34	59245	64089	-	4845	ORF57+58	Acipenserid herpesvirus 2	0.95	1e-104	0.26	ACZ55868.2
35	64477	68280	+	3804	ORF56	Acipenserid herpesvirus 2	0.64	3e-51	0.24	AEF97716.1
36	70033	71148	+	1116
37	71192	72106	+	915	putative cyclin-dependent kinase 2	Chelonid herpesvirus 5	0.61	1e-16	0.3	AHA93304.1
38	72862	73884	-	1023	protein ORF35	Anguillid herpesvirus 1	0.56	4e-12	0.27	YP_003358174.1
39	73932	74405	-	474
40	74521	76035	-	1515
41	76032	79727	-	3696
42	79791	80657	+	867	DNA methyltransferase	Lymphocystis disease virus 1	0.69	1e-09	0.27	NP_078617.1
43	81086	83332	-	2247	ORF63	Acipenserid herpesvirus 2	0.53	2e-15	0.24	AEF97717.1
44	83412	84455	-	1044	ORF62	Ictalurid herpesvirus 1	0.57	4e-44	0.45	NP_041153.2
45	84655	85278	+	624
46	85348	86556	+	1209
47	86667	87011	-	345
48	87156	87470	+	315
49	87666	88007	-	342
50	88110	88646	-	537
51	88646	89095	-	450
52	89064	89429	-	366
53	89732	93064	+	3333	PREDICTED: cGMP-specific 3'	5'-cyclic phosphodiesterase-like	0.11	5e-05	0.28	XP_012560851.1
54	93448	94365	-	918	putative ubiquitin specific peptidase C19	Organic Lake phycodnavirus 1	0.22	9e-05	0.34	ADX06043.1
55	94379	96778	-	2400	ORF73	Ictalurid herpesvirus 1	0.12	3e-10	0.35	NP_041163.1
56	96783	97730	-	948
57	97769	98590	+	822
58	98639	99046	+	408	N1R/p28 family protein	Pigeonpox virus	0.63	4e-15	0.43	YP_009046385.1
59	99333	99914	-	582
60	100111	100866	+	756	unknown protein	Grouper iridovirus	0.6	6e-11	0.28	AAV91038.1
61	100926	101423	+	498
62	102042	102608	-	567
63	102628	105984	-	3357	ORF39	Ictalurid herpesvirus 1	0.92	2e-51	0.24	NP_041130.1
64	106015	106386	-	372
65	106511	108733	+	2223	ORF37	Acipenserid herpesvirus 2	0.52	5e-11	0.21	AEF97695.1
66	108561	109583	-	1023	PREDICTED: uncharacterized protein LOC105358139	Oryzias latipes	7e-20	0.46	XP_011491977.1
67	109585	110355	-	771	PREDICTED: uncharacterized protein LOC105358139	Oryzias latipes	9e-14	0.49	XP_011491977.1
68	110367	111815	-	1449	ORF34	Acipenserid herpesvirus 2	0.7	1e-47	0.34	AEF97692.1
69	112463	113200	+	738
70	113649	116354	-	2706	hypothetical protein EH28_02830	Larimichthys crocea	8e-126	0.44	KKF18232.1
71	116409	117575	+	1167	ORF44	Acipenserid herpesvirus 2	0.52	2e-22	0.32	AEF97702.1
72	117575	118150	+	576
73	118229	119887	+	1659
74	119838	121904	+	2067	PREDICTED: GRIP and coiled-coil domain-containing protein 2-like	Neolamprologus brichardi	4e-19	0.28	XP_006800602.1
75	122015	122941	-	927	PREDICTED: uncharacterized protein LOC106097631	Oreochromis niloticus	9e-24	0.3	XP_013123506.1
76	123042	123671	-	630
77	123745	124824	+	1080	PREDICTED: uncharacterized protein LOC105358165	Oryzias latipes	7e-05	0.24	XP_011492011.1
78	124969	126285	+	1317	PREDICTED: uncharacterized protein LOC102211585	Pundamilia nyererei	1e-06	0.3	XP_005755678.1
79	126718	127035	+	318	hypothetical protein LDVICp188	Lymphocystis disease virus - isolate China	0.75	3e-09	0.32	YP_073693.1
80	127216	128247	-	1032
81	129040	129480	+	441
82	129589	130080	+	492
83	130231	130953	-	723	DNA packaging terminase subunit 1	Anguillid herpesvirus 1	3e-08	0.29	YP_003358149.1
84	131107	131958	+	852	Cbp/p300-interacting transactivator 1	Larimichthys crocea	1e-78	0.48	KKF33343.1
85	132578	133765	+	1188
86	133963	134271	-	309
87	134276	135700	-	1425	ORF64	Ictalurid herpesvirus 1	0.72	1e-10	0.21	NP_041156.1
88	135721	141636	-	5916
89	141619	143004	+	1386
90	143042	146761	+	3720
