# Supplementary material for: A novel viral lineage distantly related to herpesviruses discovered within fish genome sequence data
Source: Oxford University Press journal article supplement (doi:10.1093/ve/vex016), 2017-07-01
Supplement: vex016_Supp_table_s5.xlsx [file vex016_Supp_table_s5.xlsx]

## Sheet: both_genemarks.gff
ORF	Start	Stop	strand	length	Description	species	Coverage	E value	Identity	Accession
1	3	146	+	144
2	288	1511	-	1224
3	1590	6512	-	4923	ORF57+58	Acipenserid herpesvirus 2]	0.91	3e-104	0.27	ACZ55868.2
4	7530	11501	+	3972	ORF56	Acipenserid herpesvirus 2]	0.34	8e-42	0.25	AEF97716.1
5	12141	12548	-	408	PREDICTED: type-2 angiotensin II receptor-like	Oryzias latipes]	0.94	3e-10	0.28	XP_004084729.1
6	13730	15526	-	1797	ORF54	Ictalurid herpesvirus 1]	0.28	5e-08	0.25	NP_041145.1
7	15627	16751	-	1125	ORF60	Siberian sturgeon herpesvirus]	0.53	6e-25	0.29	ADC79712.1
8	16881	17618	+	738
9	20008	21156	+	1149
10	21195	22976	+	1782	ORF25	Acipenserid herpesvirus 2]	0.75	9e-35	0.28	AEF97684.1
11	23479	24360	+	882	ORF27	Acipenserid herpesvirus 2]	0.38	3e-10	0.32	AEF97686.1
12	24549	24998	-	450
13	25219	25734	-	516
14	26408	27358	-	951	unnamed protein product	Oncorhynchus mykiss]	0.4	1e-20	0.42	CDQ74451.1
15	27641	29503	-	1863	ORF28	Ictalurid herpesvirus 1]	0.26	3e-12	0.34	NP_041119.1
16	30056	30805	+	750
17	30912	34868	+	3957	ORF46	Acipenserid herpesvirus 2]	0.66	9e-99	0.28	AEF97704.1
18	35684	35950	+	267
19	36634	37443	-	810	PREDICTED: uncharacterized protein LOC105920738	Fundulus heteroclitus]	0.88	5e-48	0.4	XP_012711817.1
20	37876	38445	+	570	ORF077R	Rock bream iridovirus]	0.8	8e-29	0.4	AAT71892.1
21	39738	41069	+	1332
22	41606	42544	+	939
23	43132	43881	-	750	PREDICTED: NEDD4 family-interacting protein 1-like isoform X1	Astyanax mexicanus]	0.74	6e-09	0.28	XP_007258638.1
24	43953	44810	-	858
