# Supplementary material for: A novel viral lineage distantly related to herpesviruses discovered within fish genome sequence data
Source: Oxford University Press journal article supplement (doi:10.1093/ve/vex016), 2017-07-01
Supplement: vex016_Supp_table_s6.xlsx [file vex016_Supp_table_s6.xlsx]

## Sheet: both_genemarks.gff
ORF	Start	Stop	strand	length	Description	species	Coverage	E value	Identity	Accession
1	2	646	+	645	ORF25	Ictalurid herpesvirus 1	0.87	1e-16	0.31	NP_041116.1
2	727	1557	+	831	DNA helicase	Cyprinid herpesvirus 2	0.4	3e-17	0.41	AGG54974.1
3	1982	2368	+	387
4	3028	5442	-	2415	ORF46	Acipenserid herpesvirus 2	0.76	1e-92	0.29	AEF97704.1
5	5420	6328	-	909
6	6440	6880	-	441
7	7019	7936	-	918
8	8491	10467	+	1977	ORF88	Ranid herpesvirus 2	0.24	6e-14	0.32	YP_656596.1
9	10776	11843	+	1068	unnamed protein product	Oncorhynchus mykiss	0.52	1e-56	0.56	CDQ74451.1
10	11903	12382	+	480
11	12487	13026	+	540
12	13302	13766	+	465
13	14257	15126	-	870	ORF27	Acipenserid herpesvirus 2	0.45	9e-08	0.3	AEF97686.1
14	15906	16775	-	870	ORF27	Acipenserid herpesvirus 2	0.45	9e-08	0.3	AEF97686.1
15	16871	17305	-	435
16	18739	19515	-	777	hypothetical protein EH28_00657	Larimichthys crocea	0.72	1e-131	1	KKF32811.1
17	19711	20094	-	384
18	20318	21988	-	1671
19	22005	25037	-	3033
20	25713	26393	+	681	hypothetical protein	European catfish virus	0.69	2e-13	0.34	YP_006347673.1
21	26490	27392	+	903	ORF072R	Infectious spleen and kidney necrosis virus	0.53	6e-18	0.35	NP_612294.1
22	28521	29483	-	963	PREDICTED: uncharacterized protein LOC105358165	Oryzias latipes	0.67	1e-18	0.28	XP_011492011.1
23	29912	30925	-	1014	protein ORF35	Anguillid herpesvirus 1	0.64	3e-15	0.28	YP_003358174.1
24	31045	31359	-	315
25	32442	32855	-	414
26	32776	34959	-	2184
27	35026	35904	+	879	cytosine DNA methyltransferase	Turbot reddish body iridovirus	0.87	3e-10	0.26	ADE34390.1
28	36124	38415	-	2292	ORF63	Acipenserid herpesvirus 2	0.54	5e-21	0.25	AEF97717.1
29	38929	39984	-	1056	ORF62	Ictalurid herpesvirus 1	0.55	2e-42	0.43	NP_041153.2
30	39986	40819	+	834
31	41698	42045	+	348
32	42176	42619	+	444
33	43689	44207	-	519
34	44715	45632	-	918	ORF68	Ranid herpesvirus 2	0.82	8e-14	0.26	YP_656576.1
35	45631	46434	+	804	Cbp/p300-interacting transactivator 1	Larimichthys crocea	1	0	0.98	KKF33343.1
36	46396	46695	-	300	ORF62	Ictalurid herpesvirus 1	0.9	3e-08	0.32	NP_041153.2
37	47426	48541	+	1116
38	48979	51192	-	2214	ORF56	Ictalurid herpesvirus 1	0.39	1e-35	0.3	NP_041147.1
39	51201	51515	-	315
40	51822	52634	+	813
41	53619	55748	+	2130	putative reverse transcriptase	Cotesia sesamiae	0.46	7e-20	0.27	AGO14420.1
42	56499	58067	-	1569
43	58617	58916	-	300
44	59129	61504	+	2376	ORF57+58	Acipenserid herpesvirus 2	0.78	5e-54	0.29	ACZ55868.2
45	61737	63833	+	2097	DNA polymerase	Salmonid herpesvirus 1	0.65	8e-32	0.25	AAC59316.1
46	63809	64174	+	366
47	64228	64851	+	624
48	64911	65375	+	465
49	66842	67558	-	717
50	67592	68005	-	414
51	68336	68650	-	315
52	68907	69446	+	540
53	70189	71118	-	930
54	72132	73718	-	1587
55	73723	74061	-	339
